# Supplementary material
Source: PubMed Central journal article supplement (PMC5100787)
Supplement: supp_pp.16.01211_PP2016-01211R1_Supplemental_Materialtbl1.pdf [file supp_pp.16.01211_PP2016-01211R1_Supplemental_Materialtbl1.pdf]

**Supplemental Table S1.** Genotyping and recombinant mapping markers used in this study.

| Genotyping markers                     | Primer name                            | Primer sequence                                                   | Restriction enzyme | Product size (bp) |                     |
|----------------------------------------|----------------------------------------|-------------------------------------------------------------------|--------------------|-------------------|---------------------|
|                                        |                                        |                                                                   |                    | Wild type         | Mutant or transgene |
| <i>pex2-1</i>                          | PEX2-18<br>PEX2-DpnII                  | TGCGTTGCCTCCGTTGGTGGTCAG<br>CATACAGACCTGCTCAGAATCACCCGAT          | DpnII              | 65                | 93                  |
| <i>pex4-1</i>                          | PEX4-A<br>PEX4-B                       | TGCATCTCTTTTTATAACAACCTTCTCC<br>GAACTAGAACC GAACGGGAACCAAACC      | MnII               | 201,<br>91        | 292                 |
| <i>pex4-2</i>                          | PEX4-16<br>PEX4-dCAPS-RsaI             | ATTCGGGTTGCTTCAGTTCG<br>CTTAGAAGATTCCCTTTTTCCATAGCAAG             | RsaI               | 139               | 108,<br>31          |
| <i>pex6-1</i>                          | F1003-7<br>F1003-T                     | CAGACTTTACTGGCAAAGCTGTGGCG<br>GCTTGACCTATAATAAACAGATCCTGGG        | XhoI               | 270,<br>115       | 385                 |
| <i>pex10-2</i>                         | PEX10-11<br>PEX10-PstI                 | CGTTGAAGTTGAATCGGAGGTAGAC<br>AATATAGTTTTGGTATTGTTCTGCA            | PstI               | 92                | 120                 |
| <i>pex12-1</i>                         | PEX12-dCAPS-F<br>PEX12-dCAPS-HindIII-R | AGCTTGGTTACTGCCTTTTT<br>AACAGAAAGCTCTTCATCCCCTAAGCT               | HindIII            | 201               | 171,<br>30          |
| <i>35S:PEX12-CFP</i>                   | PEX12-CFP-F<br>PEX12-CFP-R             | TGTTGTTTCAGGTGGGAGGTG<br>GAATAAGCATCAGAGCAGCAAAGA                 | -                  | 284               | 284,<br>186         |
| <i>35S:GFP-PTS1</i>                    | 35S-F<br>GFP-1                         | GGATGACGCACAATCCCCTATCCTTCG<br>TTGAAAAGCATTGAACACCATAAGAGAAAGT    | -                  | -                 | 321                 |
| Mapping markers                        |                                        |                                                                   |                    | Col-0             | Ler                 |
| <i>nga172</i> (near <i>At3g03340</i> ) | <i>nga6172-1</i><br><i>nga6172-2</i>   | TACATCCGAATGCCATTGTTCCCTATCATTG<br>AGCACATCAAGCTGCTTCCTTATAGCGTCC | -                  | 170               | 150                 |
| F22F7 (near <i>At3g05520</i> )         | F22F7-3<br>F22F7-4                     | GTGATGCATGAACCTGATCTTAAATCCTAC<br>CTGATATCTACATGCAACTCTTATGCTG    | EcoRV              | 320,<br>130       | 450                 |
| SEC304 (near <i>At3g06654</i> )        | SEC304-1<br>SEC304-RsaI                | CAAAAATTCCAAGAAGAGTACAAGAGGAC<br>TAGAAAAAGAACAGTAGAGTAATTTGAGTA   | RsaI               | 156               | 128                 |

Col-0, Columbia; *Ler*, Landsberg *erecta*
